1 **A global meta-analysis of effects of green infrastructure on COVID-19 infection**  
2 **and mortality rates**

3 Bopaki Phogole and Kowiyou Yessoufou\*

4 Department of Geography, Environmental Management, and Energy Studies,  
5 University of Johannesburg, Johannesburg, South Africa

6

7

8 \*Correspondence: [kowiyouy@uj.ac.za](mailto:kowiyouy@uj.ac.za)

9

10 **Abstract**

11 Evidence of the benefits of greenspaces or greenness to human wellbeing in the  
12 context of COVID-19 is fragmented and sometimes contradictory. This calls for a  
13 meta-analysis of existing studies to clarify the matter. Here, we identified 621 studies  
14 across the world, which were then filtered down to 13 relevant studies covering  
15 Africa, Asia, Europe, and USA. These studies were meta-analysed, with the impacts  
16 of greenspaces on COVID-19 infection rate quantified using regression estimates  
17 whereas impacts on mortality was measured using mortality rate ratios. We found  
18 evidence of significant negative correlations between greenness and both COVID-19  
19 infection and mortality rates. We further found that the impacts on COVID-19  
20 infection and mortality are moderated by year of publication, greenness metrics,  
21 sample size, health and political covariates. This clarification has far-reaching  
22 implications on policy development towards the establishment and management of  
23 green infrastructure for the benefits of human wellbeing.

## 24 **Introduction**

25 Global human population is changing rapidly following an exponential growth path,  
26 putting tremendous pressures on natural resources. Currently, it is approximately 7.9  
27 billion people<sup>1</sup> and is predicted to reach above 9 billion by 2050 or 11 billion by  
28 2100<sup>2</sup>. In response, nature fights back in various ways to bring down global  
29 population to a sustainable level. One of these ways is through global pandemics,  
30 e.g., COVID-19. Indeed, the world has been witnessing COVID-19 pandemic since  
31 2020, with over half a million of infection cases and over 20,000 deaths in 2020<sup>3</sup>. In  
32 2022, these figures grew tremendously, reaching over 600 million cumulative cases  
33 with over 6 million cumulative deaths<sup>4</sup>. Subsequently, various studies, using different  
34 metrics of greenness (the total amount of vegetation in an area), were conducted  
35 across the globe to investigate whether greenness act as buffer infrastructure  
36 against the spread of COVID-19 infection rates and severity.

37

38 However, the findings reported in these studies are mixed<sup>5,6</sup>. For example, ref.<sup>7</sup>  
39 found that a 0.1 increase in NDVI is linked to 4.1% reduction in COVID-19 incidence  
40 rate ratio in the USA. A similar pattern was observed using street-level indicators of  
41 greenness<sup>8</sup>. The mitigating effects of greenness have also been reported elsewhere:  
42 in China and India, an increase in greenness shows a strong negative association  
43 with the spread of COVID-19 infections and mortalities<sup>9,10</sup>. These negative effects  
44 may be interpreted as follows: activities of the Natural Killer (NK) cells in human  
45 body are boosted with frequent exposure to vegetation<sup>3,11</sup> – NK cells, as part of the  
46 immune system, attack to eliminate virus-infected cells<sup>12</sup>. Also, by safeguarding  
47 against air pollution, vegetation contributes to lower health risks that may aggravate  
48 the severity of COVID-19 infection<sup>13,14</sup>. Additionally, green infrastructure often  
49 provides spacious environment for physical exercise, recreation, and social events  
50 with reduced chances of person-to-person contact<sup>15,16</sup>. As opposed to these negative  
51 correlations between greenness and COVID-19 infection rates, reports of positive  
52 correlations are also documented. For example, ref.<sup>6</sup> found that urban greenspaces  
53 were associated with an increase in the spread of COVID-19 infections (see also  
54 ref.<sup>15,16</sup>).

55

56 These mixed findings could be linked to the differences in how COVID-19 severity  
57 was measured, e.g., as hospitalization rates, mortality rates, admission rate to ICU,  
58 etc. Additional sources of differences in findings may be linked to differences in  
59 sample size, type and number of covariates considered, and choice of statistical  
60 tests<sup>17,18</sup>. Furthermore, the mixed findings may be linked to differences in how  
61 greenness was measured in different studies. Indeed, greenness was variously  
62 measured as street trees, botanical gardens, natural forests and grasslands, and  
63 residential gardens or as amount of greenness captured in NDVI or EVI or as quality  
64 of green infrastructure<sup>7,8,19,20</sup>. For example, ref.<sup>15</sup> measured greenness as ‘green  
65 space density’ which is the proportion of specific vegetation types in a given spatial  
66 unit which they correlated with COVID-19 infection risk measured as ‘venue density’  
67 (number of buildings visited by confirmed COVID-19 positive cases). Since  
68 greenspaces are attraction sites, they attract increasing number of visitors, thus  
69 increasing the infection risks, and leading to a positive correlation between  
70 greenness and infection rate<sup>15</sup>. Furthermore, the mixed findings may be linked to the  
71 use of various confounding factors in the model of COVID-19 infection and mortality  
72 rates. These factors may be age<sup>21</sup>, ethnicity<sup>22</sup>, and poverty level<sup>23</sup>, among others.

73

74 The emergence of conflicting findings presents a challenge with regards to the  
75 generalization of the benefits of greenness to human wellbeing in the context of  
76 COVID-19 pandemic. In such context, a meta-analysis of existing evidence presents  
77 an opportunity to integrate the conflicting reported effects of greenness on COVID-19  
78 infection rates and severity to investigate whether generalization is possible.  
79 Scientifically rigorous methodologies are increasingly adopted in various studies to  
80 improve the validity of findings and lower between-study heterogeneity. These  
81 include the use of larger sample sizes, use of multiple predictors, choice of relevant  
82 statistical tests and covariates, and use of fine spatial scales<sup>23-26</sup>. Regardless of  
83 these advances, consolidation of measured effect sizes and determination of  
84 between-study heterogeneity is still needed. To date, several studies have  
85 investigated the relationships between the provision and quantity of greenness and  
86 its effects on the spread and severity of COVID-19<sup>5,7,10,20</sup>. However, in the context of  
87 conflictual findings reported, a meta-analysis imposes itself or becomes an obligation  
88 if we are to clarify how greenness or green infrastructure relates to COVID-19. In the  
89 present study, our main objective is to provide such clarifications.

## 90 **Results**

### 91 ***Characteristics of studies included in the meta-analysis***

92 A total of 621 studies across the world (Figure 1A) were identified through the search  
93 of Scopus, PubMed, and Google scholar platforms. After removing irrelevant and  
94 duplicate studies, 25 studies remained, covering Africa, Asia, Europe, and USA  
95 (Figure 1B). A review of the 25 full-text articles resulted in a removal of 12 studies  
96 that were either review/commentary in nature or did not report the required statistical  
97 parameters for meta-analysis.

98

99 The study characteristics are summarized in Table S1. Nine studies that tested the  
100 relationships between greenness and COVID-19 infections and four studies that  
101 investigated the relationships between greenness and COVID-19 mortality rates  
102 were included in the final synthesis. Most of the studies (nine out of 13) were  
103 conducted in the United States of America (USA) whereas China, England, India,  
104 and South Africa each had one study (Figure 1B). A total of 7 out of 13 studies used  
105 more than one predictor of COVID-19 impact in each study with normalised  
106 difference vegetation index (NDVI) and abundance of greenness as the mostly used  
107 measures of greenness (Figure 2A). Because multiple predictors are used in a single  
108 study, a total of 45 different correlations between infection rates and greenness were  
109 produced in all 13 studies and 14 correlations between mortality rates and  
110 greenness were produced from four studies of COVID-19. We classified covariates  
111 into five broad groups: climatic, demographic, economic, health, and political. All 13  
112 studies considered at least one demographic covariate in their analyses, and only  
113 four studies included climatic, demographic, economic, health, and political  
114 covariates (Figure 2B).

115

### 116 ***Greenness and COVID-19 infections***

117 We found a statistically significant negative effect of greenness on COVID-19  
118 infections ( $\beta = -0.08$ , 95% CI:  $-0.1396 - -0.0252$ ;  $t=-2.90$ ;  $p=0.006$ ) with a prediction  
119 interval of  $[-0.3601 - 0.1954]$  (95% CI) (Figure 3). Between-study heterogeneity  
120 variance was estimated at  $\tau^2 = 0.0184$  (95% CI:  $0.0185 - -0.0813$ ), with an  $I^2$  value of  
121 94.1% (95% CI: 92.9% – 95.1%). Subgroup analyses reveal that between-study  
122 heterogeneity can be attributed to year of publication ( $X^2=8.24$ ;  $p=0.02$ ), choice of

123 predictors ( $X^2=129.68$ ;  $p<0.01$ ), and use of political covariates ( $X^2=8.27$ ;  $p<0.01$ )  
124 (see Table 1 and Figures S1 – S6).

125

### 126 ***Greenness and COVID-19 mortalities***

127 We found that an increase in greenness was strongly linked to lower mortality rate  
128 ratio (MRR= 0.9272; 95% CI: 0.8788 – 0.9783;  $t=-3.05$ ;  $p=0.009$ ) with a prediction  
129 interval of [0.7683 – 1.1189] (95% CI) (Figure 4). Furthermore, an estimated 0.0069  
130 between-study heterogeneity variance (95% CI: 0.0032 – 0.0228) was observed with  
131 an  $I^2$  value of 92% (95% CI: 88.3% – 94.5%). We also found that year of publication  
132 ( $X^2=19.10$ ;  $p<0.01$ ), sample size ( $X^2=7.92$ ;  $p<0.01$ ), choice of predictors ( $X^2=14.92$ ;  
133  $p<0.01$ ), and use of health ( $X^2=7.92$ ;  $p<0.01$ ) and political ( $X^2=22.75$ ;  $p<0.01$ )  
134 covariates strongly impact the degree of heterogeneity (see Table 2 & Figures S7 –  
135 S13).

136

### 137 ***Publication bias***

138 Existence of publication bias was investigated using the Funnel approach and Orwin  
139 fail-safe number. The presence of funnel plot symmetry (Figure 5A) indicated a lack  
140 of publication bias for studies that investigate the effect of greenness on COVID-19  
141 infections (Fail-safe N: 45). Publication bias was, however, observed for studies that  
142 test the relationship between greenness and COVID-19 mortalities (Figure 5B; Fail-  
143 safe N: 14).

144

145

### 146 ***Discussion***

147 Our meta-analysis provides evidence that an increase in abundance or exposure to  
148 greenness is associated with a significant reduction in COVID-19 infection rates and  
149 death cases<sup>10,19,27</sup>. However, we found high heterogeneity between the studies that  
150 were included in the meta-analysis. Subgroup analyses revealed that heterogeneity  
151 in studies on COVID-19 infections and mortality is strongly predicted by the studies'  
152 years of publication, choices of predictors (metrics of greenness), and inclusion of  
153 political covariates. Additionally, sample size and consideration of health covariates  
154 strongly affect heterogeneity of studies on COVID-19 mortalities.

155

156 The sensitivity of effect size to year of publication can be attributed to availability of  
157 data to adequately model the impact of COVID-19. The spread of COVID-19 and  
158 increased global testing for COVID-19 infection accelerated overtime, thus allowing  
159 successive studies to have an increasingly larger data pool<sup>28,29</sup>. This may also  
160 impact sample sizes that are adopted in each study. As more regions produce more  
161 data on COVID-19 infections and mortality, their eligibility to be included in studies  
162 investigating the correlations between COVID-19 and greenness may enhance study  
163 designs. In our subgroup analysis, we found that studies that used smaller sample  
164 sizes (n<2000) are likely to report larger effect sizes compared to studies with larger  
165 sample sizes. Given the importance of selecting an appropriate sample size<sup>30</sup>, the  
166 need to define an appropriate sample size for investigating the health benefits of  
167 green infrastructure remains critical.

168

169 The diversity of greenness metrics, ranging from street trees to large forests,  
170 presents a unique challenge while measuring their impacts. Commonly, studies that  
171 cover large study areas use vegetation indices such as NDVI or EVI which are  
172 retrieved from satellite imagery<sup>31-33</sup>. Since health benefits of greenness are usually  
173 felt closer to the greenness<sup>34,35</sup>, several studies consider local greenness such as  
174 household gardens<sup>36</sup>, street trees<sup>37,38</sup>, and local parks<sup>39,40</sup> in their analysis. However,  
175 this approach is only feasible when focusing on smaller areas. In some cases,  
176 subjective measures of greenness were used<sup>41,42</sup>. Our findings in the present study  
177 suggest that the choice of greenness metrics adopted in different studies affects the  
178 its effect size. The use of NDVI, EVI or vegetation canopy size produces large effects  
179 of greenness against COVID-19 infections and mortalities. In contrast, studies that  
180 use proximity or visitation patterns are likely to report marginal effects.

181

182 All studies in our meta-analysis have included demographic covariates, and 92% of  
183 studies included economic covariates. While modelling the effects of greenness, the  
184 inclusion of demographic variables such as population density and age structure, as  
185 well as economic indicators such as gross domestic product (GDP) and household  
186 income level as covariates have been largely adopted<sup>7,9,27,43</sup>. Furthermore, the use of  
187 health covariates featured in several studies<sup>5,19,26</sup>. However, consideration of political  
188 covariates in the modelling of greenness benefits to human wellbeing in the context  
189 of COVID-19 is only starting to emerge<sup>5,6</sup>. Political factors such as promulgation of

190 mobility restrictions<sup>15,44</sup> and face-masks mandates<sup>45</sup> have shown to be significant  
191 predictors of COVID-19 impacts, although their inclusion in studies linking greenness  
192 to COVID-19 infection and severity remains limited. We found that the use of political  
193 covariates significantly affects the effect size. Inclusion of political covariables  
194 resulted in a greater effect size in studies of COVID-19 mortality and in a smaller  
195 effect size in studies of COVID-19 infections. This may suggest that existing policies  
196 are more effective in reducing COVID-19 fatalities than curbing the spread of  
197 infections.

198

199 Overall, meta-analysing studies from Africa, Asia, Europe, and USA, we found strong  
200 support for beneficial effects of greenness to human in the face of COVID-19  
201 infection and severity, suggesting that positive correlations reported in some studies  
202 between greenness vs. infection and mortality rates<sup>15,16</sup> might simply imply that the  
203 greenness metrics used in those studies (e.g., green space density or accessibility to  
204 greenspaces) do not fully capture important facets of greenness. This calls for a  
205 need to homogenize greenness metrics in studies to come. There is also a need for  
206 homogenization of COVID-19 severity metrics since we could not include  
207 hospitalization rate in the present study as a measure of COVID-19 severity because  
208 very limited studies have investigated hospitalization rate. Lastly, our results showed  
209 high degree of between-study heterogeneity which can be explained by year of  
210 publication, sample size, and choice of predictor variables and covariates. However,  
211 evidence from existing studies show that green infrastructure moderates the impact  
212 of COVID-19 by reducing prevalence of infections and associated mortalities.

213

214 Nevertheless, our findings have some far-reaching implications for the establishment  
215 and management of green infrastructure: greenspaces must be acknowledged as  
216 critical infrastructure that has substantial broader public health values, and as such,  
217 deserve enough fundings from governments worldwide, especially in the developing  
218 world.

219

220

221

222

223



224 **Methods**

225 ***Study selection***

226 The Preferred Reporting Items for Systematic Reviews and Meta-Analyses  
227 (PRISMA) guidelines<sup>46</sup> were followed to search for literature that focus on green  
228 infrastructure and its impact on COVID-19. All search results were reviewed for  
229 relevance based on their title and abstract to be considered for meta-analysis (Figure  
230 6). Furthermore, reference lists of all included articles were reviewed to identify  
231 studies that meet the inclusion criteria.

232

233 ***Search strategy***

234 Literature search was limited to PubMed, Scopus, and Google Scholar. The following  
235 search string was used to search for literature on the 17<sup>th</sup> of April 2023:  
236 ("Greenspace" or "green space" or "greenery" or "greenness" or "vegetation" or  
237 "trees" or "forest" or "grass" or "grassland") and ("COVID-19" or "SARS-CoV-2" or  
238 "coronavirus" or "COVID"). We did not apply any restrictions on publication date in  
239 the search.

240

241 ***Eligibility criteria***

242 Inclusion criteria for this study were as follow: (a) original research that investigates  
243 effects of green infrastructure on COVID-19 infections and related mortalities; (b) full-  
244 text is available; (c) publication is in English; (d) required statistical parameters for  
245 meta-analysis are reported in the main article or supplementary files (i.e., regression  
246 estimates for predicting COVID-19 infections, and mortality rate ratios for predicting  
247 COVID-19 mortalities). Exclusion criteria were review or commentary articles, articles  
248 without required parameters, and articles not in English (see Figure 6).

249

250 ***Data extraction and analysis***

251 A predetermined template was used to collect study characteristics which are  
252 surname of first author, year of publication, country of study, measure of green  
253 infrastructure, temporal extent of study, sample size, measure of COVID-19, effect  
254 type, effect size, standard error or confidence interval, and list of covariates. All data  
255 analysed in this study are available as Supplemental Information (Appendix 1).

256

257 All analyses were conducted in R version 4.2.3<sup>47</sup> (see R script in Supplemental  
258 Information). Two separate meta-analyses were conducted, focusing on impacts of  
259 greenness on COVID-19 infections (*meta-analysis 1*) and COVID-19 mortalities  
260 (*meta-analysis 2*). Regression estimates were used as pre-calculated effect type  
261 when analysing COVID-19 infections, and mortality rate ratios (MRR) were used as  
262 pre-calculated effect type when analysing COVID-19 mortalities. Subsequently,  
263 subgroup analyses were applied to the same data to test the effects of predictor  
264 variables, sample size, and selection of covariates. Random models were selected in  
265 each analysis using *metagen* function found in the “Metafor” R library<sup>48</sup>.

266

267 Outcomes are reported as pooled regression estimates for COVID-19 infections and  
268 as pooled MRR for COVID-19 deaths. Furthermore, in each case, a 95% confidence  
269 interval (CI), t-value, and p-values are reported with  $p < 0.005$  considered as an  
270 indicator of statistical significance. Between-studies heterogeneity was quantified  
271 using Higgins & Thompson’s  $I^2$  statistic<sup>49</sup> with the  $I^2$  value of less than 25%, 50% and  
272 75% indicating low, moderate, or high heterogeneity, respectively. Heterogeneity  
273 variance and prediction interval were also reported to measure the extent of  
274 between-study heterogeneity. Publication bias was tested using the Funnel  
275 approach<sup>50</sup> (Sterne & Egger 2001) and the Orwin’s fail-safe number<sup>51</sup>.

276 **Acknowledgements:**

277 KY acknowledges the South Africa's National Research Foundation (grant #  
278 SRUG22051210107).

279 **Author Contributions:**

280 KY conceived the project, BP collected the data, BP analysed the data, KY and BP  
281 wrote the paper.

282 **Data Availability:**

283 All data generated or analysed in this study are included in this article (and its  
284 Supplementary Information files).

285 **Conflict of Interest Statement**

286 The authors declare no conflict of interests.

287 **Code availability:** Code to replicate all results in this paper is available as  
288 Supplemental Information.

## 289 References

- 290 1- UN DESA (United Nations Department of Economic and Social Affairs).  
291 Global Population Growth and Sustainable Development Goals. 2021.  
292 Available online:  
293 <https://www.un.org/development/desa/pd/sites/www.un.org.development.desa>  
294 [.pd/files/undesa\\_pd\\_2022\\_global\\_population\\_growth.pdf](https://www.un.org/development/desa/pd/sites/www.un.org.development.desa/pd/files/undesa_pd_2022_global_population_growth.pdf) (accessed on 12  
295 December 2021).
- 296 2- Bongaarts, J. 2016. Development: Slow down population growth. *Nature* **530**,  
297 409–412.
- 298 3- WHO (World Health Organisation). 2020. Coronavirus disease 2019 (COVID-  
299 19), Situation Report– 65. Available at  
300 <https://www.who.int/publications/m/item/situation-report---65>
- 301 4- WHO (World Health Organisation). 2022. WHO coronavirus (COVID-19)  
302 dashboard. Available at <https://covid19.who.int/>
- 303 5- Yang, Y., Lu, Y. & Jiang, B. (2022). Population-weighted exposure to green  
304 spaces tied to lower COVID-19 mortality rates: A nationwide dose-response  
305 study in the USA. *Science of The Total Environment*, 851: 158333.  
306 <https://doi.org/10.1016/j.scitotenv.2022.158333>.
- 307 6- Zhai, W., Yue, H. & Deng, Y. (2022). Examining the association  
308 between urban green space and viral transmission of COVID-19 during the  
309 early outbreak. *Applied Geography*, 147: 102768.  
310 <https://doi.org/10.1016/j.apgeog.2022.102768>.
- 311 7- Spotswood, E.N., Benjamin, M., Stoneburner, L., Wheeler, M. M.,  
312 Beller, E. E., Balk, D., McPhearson, T., Kuo, M. & McDonald, R. I. (2021).  
313 Nature inequity and higher COVID-19 case rates in less-green  
314 neighbourhoods in the United States. *Nature Sustainability*, 4(12): 1092–1098.  
315 <https://doi.org/10.1038/s41893-021-00781-9>.
- 316 8- Nguyen, Q.C., Huang, Y., Kumar, A., Duan, H., Keralis, J.M., Dwivedi,  
317 P., Meng, H.W., Brunisholz, K.D., Jay, J., Javanmardi, M. & Tasdizen, T.  
318 (2020). Using 164 Million Google Street View Images to Derive Built  
319 Environment Predictors of COVID-19 Cases. *International Journal of*  
320 *Environmental Research and Public Health*, 17(17): 6359. Doi:  
321 10.3390/ijerph17176359. PMID: 32882867; PMCID: PMC7504319.
- 322 9- Peng, W., Dong, Y., Tian, M., Yuan, J., Kan, H., Jia, X. & Wang, W.  
323 (2022). City-level greenness exposure is associated with covid-19 incidence  
324 in China. *Environmental Research*, 209: 112871.  
325 <https://doi.org/10.1016/j.envres.2022.112871>.
- 326 10-Sikarwar, A., Rani, R., Duthé, G. & Golaz, V. (2023). Association of Greenness  
327 with covid-19 deaths in India: An Ecological Study at district level.  
328 *Environmental Research*, 217: 114906.  
329 <https://doi.org/10.1016/j.envres.2022.114906>.
- 330 11-Li, Q. 2010. Effects of forest bathing trips on human immune function.  
331 *Environmental Health and Preventive Medicine*, 15, 9–17.
- 332 12-Vivier, E., Tomasello, E., Baratin, M., Walzer, T. & Ugolini, S. 2008. Functions  
333 of natural killer cells. *Nature Immunology*, 9, 503–510.
- 334 13-Chen, Q.X., Huang, C.L., Yuan, Y. & Tan, H.P. 2020. Influence of COVID-19  
335 event on air quality and their association in mainland China. *Aerosol and Air*  
336 *Quality Research*, 20: 1541–1551.

- 337 14-Lin, J., Kroll, C. N., Nowak, D. J., & Greenfield, E. J. (2019). A review of urban  
338 forest modeling: Implications for management and future research. *Urban*  
339 *Forestry & Urban Greening*, 43, Article 126366
- 340 15-Huang, X., Shao, X., Xing, L., Hu, Y., Sin, D.D. & Zhang, X. (2021). The  
341 impact of lockdown timing on COVID-19 transmission across US counties.  
342 *EClinicalMedicine*, 38: 101035. <https://doi.org/10.1016/j.eclinm.2021.101035>.
- 343 16- Pan J., Bardhan R., Jin Y. \*, Ying Jin 2021. Spatial distributive effects  
344 of public green space and COVID-19 infection in London
- 345 17- Zhang, L. & Tan, P.Y. (2019). Associations between Urban Green  
346 Spaces and Health are Dependent on the Analytical Scale and How Urban  
347 Green Spaces are Measured. *International Journal of Environmental*  
348 *Research and Public Health*, 16(4): 578.  
349 <https://doi.org/10.3390/ijerph16040578>
- 350 18- Labib S.M., Lindley S. & Huck J.J. (2020). Scale effects in remotely  
351 sensed greenspace metrics and how to mitigate them for environmental  
352 health exposure assessment. *Computers, Environment and Urban Systems*,  
353 82: 101501. Doi: 10.1016/j.compenvurbsys.2020.101501.
- 354 19- Jiang, B., Yang, Y., Chen, L., Liu, X., Wu, X., Chen, B., Webster, C.,  
355 Sullivan, W. C., Larsen, L., Wang, J., & Lu, Y. (2022). Green spaces,  
356 especially nearby forest, may reduce the SARS-COV-2 infection rate: A  
357 nationwide study in the United States. *Landscape and Urban Planning*, 228:  
358 104583. <https://doi.org/10.1016/j.landurbplan.2022.104583>.
- 359 20- Chen, K., Klomp maker, J. O., Roscoe, C. J., Nguyen, L. H., Drew, D.  
360 A., James, P., Laden, F., Fecht, D., Wang, W., Gulliver, J., Wolf, J., Steves, C.  
361 J., Spector, T. D., Chan, A. T. & Hart, J. E. (2023). Associations between  
362 greenness and predicted COVID-19-like illness incidence in the United States  
363 and the United Kingdom. *Environmental Epidemiology (Philadelphia, Pa.)*,  
364 7(1): e244. <https://doi.org/10.1097/EE9.0000000000000244>.
- 365 21- Bajaj, V., Gadi, N., Spihlman, A. P., Wu, S. C., Choi, C. H. & Moulton, V.  
366 R. (2021). Aging, Immunity, and COVID-19: How Age Influences the Host  
367 Immune Response to Coronavirus Infections? *Frontiers in Physiology*, 11.  
368 <https://doi.org/10.3389/fphys.2020.571416>.
- 369 22- Mathur, R., Rentsch, C.T., Morton, C.E., Hulme, W.J., Schultze, A.,  
370 Mackenna, B., Eggo, R.M., Bhaskaran, K., Wong, A.Y.S., Williamson, E.J.,  
371 Forbes, H., Wing, K., McDonald, H.I., Bates, C., Bacon, S., Walker, A.J.,  
372 Evans, D., Inglesby, P., Mehrkar, A., Curtis, H.J., Devito, N.J., Croker, R.,  
373 Drysdale, H., Cockburn, J., Parry, J., Hester, F., Harper, S., Douglas, I.J.,  
374 Tomlinson, L., Evans, S.J.W., Grieve, R., Harrison, D., Rowan, K., Khunti, K.,  
375 Chaturvedi, N., Smeeth, L. & Goldacre, B. (2021). Ethnic differences in  
376 SARS-CoV-2 infection and COVID-19-related hospitalisation, intensive care  
377 unit admission, and death in 17 million adults in England: an observational  
378 cohort study using the OpenSAFELY platform. *The Lancet*, 397(10286): 1711  
379 – 1724.
- 380 23- Hussey, H., Zinyakatira, N., Morden, E., Ismail, M., Paleker, M., Bam,  
381 L., London, L., Boule, A. & Davies, A. (2021). Higher COVID-19 mortality in  
382 low-income communities in the City of Cape Town – a descriptive ecological  
383 study. *Gates Open Research*, 5.  
384 <https://doi.org/10.12688/gatesopenres.13288.1>.
- 385 24- Lu, Y., Chen, L., Liu, X., Yang, Y., Sullivan, W. C., Xu, W., Webster, C.  
386 & Jiang, B. (2021). Green spaces mitigate racial disparity of health: A higher

- 387 ratio of green spaces indicates a lower racial disparity in SARS-COV-2  
388 infection rates in the USA. *Environment International*, 152: 106465.  
389 <https://doi.org/10.1016/j.envint.2021.106465>.
- 390 25- Li, H., Zhang, G. & Cao, Y. (2022). Forest Area, CO2 Emission, and  
391 COVID-19 Case-Fatality Rate: A Worldwide Ecological Study Using Spatial  
392 Regression Analysis. *Forests*, 13(5), 736. <https://doi.org/10.3390/f13050736>.
- 393 26- Lin, J., Huang, B., Kwan, M.P., Chen, M. & Wang, Q. (2023). Covid-19  
394 infection rate but not severity is associated with availability of greenness in the  
395 United States. *Landscape and Urban Planning*, 233: 104704.  
396 <https://doi.org/10.1016/j.landurbplan.2023.104704>.
- 397 27- Klompaker, J.O., Hart, J.E., Holland, I., Sabath, M.B., Wu, X., Laden,  
398 F., Dominici, F. & James, P. (2020). County-level exposures to Greenness and  
399 associations with covid-19 incidence and mortality in the United States.  
400 *Science of the Total Environment*, 199: 111331.  
401 <https://doi.org/10.1101/2020.08.26.20181644>.
- 402 28- Singh, S., Chowdhury, C., Panja, A. K. & Neogy, S. (2021). Time Series  
403 Analysis of COVID-19 Data to Study the Effect of Lockdown and Unlock in  
404 India. *Journal of The Institution of Engineers (India): Series B*, 102(6): 1275-  
405 1281. <https://doi.org/10.1007/s40031-021-00585-7>
- 406 29- OWD (Our World in Data). 2023. Total COVID-19 tests.  
407 <https://ourworldindata.org/grapher/full-list-total-tests-for-covid-19>. (Accessed  
408 02.05.2023).
- 409 30- Springate, S. D. (2012). The effect of sample size and bias on the  
410 reliability of estimates of error: A comparative study of Dahlberg's formula.  
411 *European Journal of Orthodontics*, 34(2): 158-163.  
412 <https://doi.org/10.1093/ejo/cjr010>
- 413 31- Fong, K., Hart, J. E. & James, P. (2018). A Review of Epidemiologic  
414 Studies on Greenness and Health: Updated Literature Through 2017. *Current  
415 environmental health reports*, 5(1): 77. [https://doi.org/10.1007/s40572-018-  
416 0179-y](https://doi.org/10.1007/s40572-018-0179-y).
- 417 32- Brochu, P., Jimenez, M. P., James, P., Kinney, P. L. & Lane, K. (2022).  
418 Benefits of Increasing Greenness on All-Cause Mortality in the Largest  
419 Metropolitan Areas of the United States Within the Past Two Decades.  
420 *Frontiers in Public Health*, 10. <https://doi.org/10.3389/fpubh.2022.841936>.
- 421 33- Grigsby-Toussaint, D.S. & Shin, J.C. (2022). Covid-19, Green Space  
422 Exposure, and Mask Mandates. *Science of The Total Environment*, 836:  
423 155302. <https://doi.org/10.1016/j.scitotenv.2022.155302>.
- 424 34- Ngom, R., Gosselin, P., Blais, C. & Rochette, L. (2016). Type and  
425 Proximity of Green Spaces Are Important for Preventing Cardiovascular  
426 Morbidity and Diabetes—A Cross-Sectional Study for Quebec, Canada.  
427 *International Journal of Environmental Research and Public Health*, 13(4).  
428 <https://doi.org/10.3390/ijerph13040423>.
- 429 35- Dennis, M., Cook, P.A., James, P., Wheeler, P. & Lindley, S.J. (2020).  
430 Relationships between health outcomes in older populations and urban green  
431 infrastructure size, quality and proximity. *BMC Public Health* 20, 626.  
432 <https://doi.org/10.1186/s12889-020-08762-x>.
- 433 36- Chalmin-Pui, L. S., Griffiths, A., Roe, J., Heaton, T. & Cameron, R.  
434 (2021). Why garden? – Attitudes and the perceived health benefits of home  
435 gardening. *Cities*, 112: 103118. <https://doi.org/10.1016/j.cities.2021.103118>.



- 436 37- Marselle, M. R., Bowler, D. E., Watzema, J., Eichenberg, D., Kirsten, T.,  
437 & Bonn, A. (2020). Urban street tree biodiversity and antidepressant  
438 prescriptions. *Scientific Reports*, 10(1), 1-11. [https://doi.org/10.1038/s41598-](https://doi.org/10.1038/s41598-020-79924-5)  
439 [020-79924-5](https://doi.org/10.1038/s41598-020-79924-5).
- 440 38- Wolf, K. L., Lam, S. T., McKeen, J. K., Richardson, R. A. & Bardekjian,  
441 A. C. (2020). Urban Trees and Human Health: A Scoping Review.  
442 *International Journal of Environmental Research and Public Health*, 17(12).  
443 <https://doi.org/10.3390/ijerph17124371>
- 444 39- Orstad, S. L., Szuhany, K., Tamura, K., Thorpe, L. E. & Jay, M. (2020).  
445 Park Proximity and Use for Physical Activity among Urban Residents:  
446 Associations with Mental Health. *International Journal of Environmental*  
447 *Research and Public Health*, 17(13): 4885.  
448 <https://doi.org/10.3390/ijerph17134885>.
- 449 40- Weber, K.A., Yang, W., Carmichael, S. L., Collins, R.T., Luben, T.J.,  
450 Desrosiers, T.A., Insuf, T.I., Le, M.T., Evans, S.P., Romitti, P.A., Yazdy, M.M.,  
451 Nembhard, W.N. & Shaw, G.M. (2023). The National Birth Defects Prevention  
452 Study. (2023). Assessing associations between residential proximity to  
453 greenspace and birth defects in the national birth defects prevention study.  
454 *Environmental Research*, 216: 114760 doi:10.1016/j.envres.2022.114760.
- 455 41- Yessoufou, K., Sithole, M. & Elansary, H. O. (2020). Effects of urban  
456 green spaces on human perceived health improvements: Provision of green  
457 spaces is not enough but how people use them matters. *PLOS ONE*, 15(9):  
458 e0239314. <https://doi.org/10.1371/journal.pone.0239314>.
- 459 42- Lehberger, M., Kleih, A. & Sparke, K. (2021). Self-reported well-being  
460 and the importance of green spaces – A comparison of garden owners and  
461 non-garden owners in times of COVID-19. *Landscape and Urban Planning*,  
462 212, 104108. <https://doi.org/10.1016/j.landurbplan.2021.104108>.
- 463 43- Russette, H., Graham, J., Holden, Z., Semmens, E.O., Williams, E. &  
464 Landguth, E.L. (2021). Greenspace exposure and covid-19 mortality in the  
465 United States: January–July 2020. *Environmental Research*, 198: 111195.  
466 <https://doi.org/10.1016/j.envres.2021.111195>.
- 467 44- Haug, N., Geyrhofer, L., Londei, A., Dervic, E., Loreto, V., Piniór, B.,  
468 Thurner, S. & Klimek, P. (2020). Ranking the effectiveness of worldwide  
469 COVID-19 government interventions. *Nature Human Behaviour*, 4(12): 1303-  
470 1312. <https://doi.org/10.1038/s41562-020-01009-0>.
- 471 45- Aravindakshan, A., Boehnke, J., Gholami, E. & Nayak, A. (2022). The  
472 impact of mask-wearing in mitigating the spread of COVID-19 during the early  
473 phases of the pandemic. *PLOS Global Public Health* 2(9): e0000954.  
474 <https://doi.org/10.1371/journal.pgph.0000954>.
- 475 46- Page, M.J., McKenzie, J.E., Bossuyt, P.M., Boutron, I., Hoffmann, T.C.,  
476 Mulrow, C.D., Shamseer, L., Tetzlaff, J.M., Akl, E.A., Brennan, S.E., Chou, R.,  
477 Glanville, J., Grimshaw, J.M., Hróbjartsson, A., Lalu, M.M., Li, T., Loder, E.W.,  
478 Mayo-Wilson, E., McDonald, S., McGuinness, L.A., Stewart, L.A., Thomas, J.,  
479 Tricco, A.C., Welch, V.A., Whiting, P. & Moher, D. (2021). The PRISMA 2020  
480 statement: An updated guideline for reporting systematic reviews. *PLoS Med*  
481 18(3): e1003583. <https://doi.org/10.1371/journal.pmed.1003583>.
- 482 47- R Core Team. (2021). R: A language and environment for statistical  
483 computing. R Foundation for Statistical Computing, Vienna, Austria.  
484 <https://www.R-project.org/>.

- 485 48- Viechtbauer, W. (2010). Conducting meta-analyses in R with the  
486 metafor package. *Journal of Statistical Software*, 36(3): 1-48.  
487 <https://doi.org/10.18637/jss.v036.i03>.  
488 49- Higgins, J.P. & Thompson, S.G. (2002). Quantifying heterogeneity in a  
489 meta-analysis. *Statistics in Medicine*, 21(11): 1539 – 1558.  
490 <https://doi.org/10.1002/sim.1186>.  
491 50- Sterne, J.A.C. & Egger, M. (2001). Funnel plots for detecting bias in  
492 meta-analysis: guidelines on choice of axis. *Journal of Clinical Epidemiology*,  
493 54:1046–1055  
494 51- Orwin RG. A fail-safe N for effect size in meta-analysis. *Journal of*  
495 *Educational Statistics*. 1983;8(2):157–159.  
496



497 **Table 1:** Stratified analyses of pooled estimate of COVID-19 infections and green  
 498 infrastructure.

| Stratified analysis            | Number of results | Pooled estimate [95% CI]    | Subgroup difference $\chi^2$ , df (p-value) |
|--------------------------------|-------------------|-----------------------------|---------------------------------------------|
| <b>Study year</b>              | <b>45</b>         | <b>-0.08 [-0.14; -0.03]</b> | <b>8.24, df = 2 (p = 0.02)</b>              |
| 2021                           | 15                | -0.07 [-0.15; 0.01]         |                                             |
| 2022                           | 20                | -0.02 [-0.06; 0.02]         |                                             |
| 2023                           | 10                | -0.32 [-0.57; -0.07]        |                                             |
| <b>Sample size</b>             | <b>45</b>         | <b>-0.08 [-0.14; -0.03]</b> | <b>0.01, df = 1 (p = 0.91)</b>              |
| Small (n<2000)                 | 19                | -0.09 [-0.16; -0.02]        |                                             |
| Large (n≥2000)                 | 26                | -0.08 [-0.18; 0.02]         |                                             |
| <b>Predictor</b>               | <b>45</b>         | <b>-0.08 [-0.14; -0.03]</b> | <b>129.68, df = 4 (p &lt; 0.01)</b>         |
| Abundance                      | 25                | -0.06 [-0.12; -0.00]        |                                             |
| NDVI/EVI                       | 11                | -0.24 [-0.55; 0.07]         |                                             |
| Canopy                         | 3                 | -0.44 [-0.62; -0.27]        |                                             |
| Visitation                     | 5                 | 0.01 [0.00; 0.01]           |                                             |
| Proximity                      | 1                 | -0.02 [-0.08; 0.04]         |                                             |
| <b>Covariates: demographic</b> | <b>45</b>         | <b>-0.08 [-0.14; -0.03]</b> | <b>NA</b>                                   |
| With demographic covariates    | 45                | -0.08 [-0.14; -0.03]        |                                             |
| Without demographic covariates | 0                 |                             |                                             |
| <b>Covariates: health</b>      | <b>45</b>         | <b>-0.08 [-0.14; -0.03]</b> | <b>1.35, df = 1 (p = 0.25)</b>              |
| With health covariates         | 37                | -0.06 [-0.11; 0.00]         |                                             |
| Without health covariates      | 8                 | -0.13 [-0.28; 0.01]         |                                             |
| <b>Covariates: economic</b>    | <b>45</b>         | <b>-0.08 [-0.14; -0.03]</b> | <b>NA</b>                                   |
| With economic covariates       | 45                | -0.08 [-0.14; -0.03]        |                                             |
| Without economic covariates    | 0                 |                             |                                             |
| <b>Covariates: climatic</b>    | <b>45</b>         | <b>-0.08 [-0.14; -0.03]</b> | <b>0.35, df = 1 (p = 0.56)</b>              |
| With climatic covariates       | 19                | -0.12 [-0.27; 0.03]         |                                             |
| Without climatic covariates    | 26                | -0.08 [-0.14; -0.02]        |                                             |
| <b>Covariates: political</b>   | <b>45</b>         | <b>-0.08 [-0.14; -0.03]</b> | <b>8.27, df = 1 (p &lt; 0.01)</b>           |
| With political covariates      | 14                | -0.01 [-0.04; 0.01]         |                                             |
| Without political covariates   | 31                | -0.15 [-0.24; -0.05]        |                                             |

499 \*NDVI=Normalised Difference Vegetation Index; EVI= Enhanced Vegetation Index

500

501

502

503

504

505

506

507

508

509

510

511

512 **Table 2:** Stratified analyses of pooled mortality rate ratio of COVID-19 deaths.

| Stratified analysis            | Number of results | Pooled mortality rate ratio [95% CI] | Subgroup difference $\chi^2$ , df (p-value) |
|--------------------------------|-------------------|--------------------------------------|---------------------------------------------|
| <b>Year of publication</b>     | <b>14</b>         | <b>0.93 [0.88; 0.98]</b>             | <b>19.10, df = 2 (p&lt; 0.01)</b>           |
| 2021                           | 4                 | 0.90 [0.78; 1.03]                    |                                             |
| 2022                           | 6                 | 0.99 [0.96; 1.02]                    |                                             |
| 2023                           | 4                 | 0.83 [0.73; 0.96]                    |                                             |
| <b>Sample size</b>             | <b>14</b>         | <b>0.93 [0.88; 0.98]</b>             | <b>7.92, df = 1 (p&lt; 0.01)</b>            |
| Small (n<2000)                 | 4                 | 0.83 [0.73; 0.96]                    |                                             |
| Large (n≥2000)                 | 10                | 0.96 [0.91; 1.01]                    |                                             |
| <b>Predictor</b>               | <b>14</b>         | <b>0.93 [0.88; 0.98]</b>             | <b>14.92, df = 2 (p&lt; 0.01)</b>           |
| Canopy                         | 3                 | 0.87 [0.72; 1.05]                    |                                             |
| NDVI/EVI                       | 5                 | 0.87 [0.76; 0.99]                    |                                             |
| Abundance                      | 6                 | 0.99 [0.96; 1.02]                    |                                             |
| <b>Covariates: demographic</b> | <b>14</b>         | <b>0.93 [0.88; 0.98]</b>             | <b>NA</b>                                   |
| With demographic covariates    | 14                | 0.93 [0.88; 0.98]                    |                                             |
| Without demographic covariates | 0                 |                                      |                                             |
| <b>Covariates: health</b>      | <b>14</b>         | <b>0.93 [0.88; 0.98]</b>             | <b>7.92, df = 1 (p&lt; 0.01)</b>            |
| With health covariates         | 10                | 0.96 [0.91; 1.01]                    |                                             |
| Without health covariates      | 4                 | 0.83 [0.73; 0.96]                    |                                             |
| <b>Covariates: economic</b>    | <b>14</b>         | <b>0.93 [0.88; 0.98]</b>             | <b>2.60, df = 1 (p= 0.11)</b>               |
| With economic covariates       | 11                | 0.95 [0.89; 1.01]                    |                                             |
| Without economic covariates    | 3                 | 0.87 [0.72; 1.05]                    |                                             |
| <b>Covariates: climatic</b>    | <b>14</b>         | <b>0.93 [0.88; 0.98]</b>             | <b>2.60, df = 1 (P = 0.11)</b>              |
| With climatic covariates       | 11                | 0.95 [0.89; 1.01]                    |                                             |
| Without climatic covariates    | 3                 | 0.87 [0.72; 1.05]                    |                                             |
| <b>Covariates: political</b>   | <b>14</b>         | <b>0.93 [0.88; 0.98]</b>             | <b>22.75, df = 1 (p&lt; 0.01)</b>           |
| With political covariates      | 7                 | 0.85 [0.80; 0.92]                    |                                             |
| Without political covariates   | 7                 | 0.99 [0.97; 1.01]                    |                                             |

513 \*NDVI=Normalised Difference Vegetation Index; EVI= Enhanced Vegetation Index

514

515

516

517

518

519

520

521

522

523

524

525

526 **FIGURE CAPTIONS**

527 **Figure 1.** Geography of studies investigating the effects of greenness on COVID-19  
528 infection and mortality rates. (A) Geographical distribution of 621 studies that were  
529 retrieved through the search of Scopus, PubMed, and Google scholar; (B)  
530 Geographical distribution of studies from our search that focus specifically on the  
531 effects of greenness on COVID-19 infections and severity.

532 **Figure 2.** Venn diagram showing the shared factors used in multiple studies that  
533 investigate the effects of greenness on COVID-19 infection and mortality rates. A)  
534 different metrics of greenness; B) socio-environmental and economic co-variates  
535 used those studies.

536 **Figure 3.** Forest plot of the relationship between greenness and COVID-19  
537 infections.

538 **Figure 4.** Forest plot of the relationship between greenness and COVID-19  
539 mortalities.

540 **Figure 5.** Funnel plot to test for publication bias in studies on A) COVID-19  
541 infections, and B) on COVID-19 mortality.

542 **Figure 6.** PRISMA low diagram for literature search and screening.

543 **SUPPLEMENTAL INFORMATION**

544 **TABLES**

545 **Table S1.** Characteristics of all studies included in the present meta-analysis.

546

547 **Figures S1-S6.** Subgroup analyses of between-study heterogeneity can be  
548 attributed to year of publication ( $X^2=8.24$ ;  $p=0.02$ ), choice of predictors ( $X^2=129.68$ ;  
549  $p<0.01$ ), and use of political covariates ( $X^2=8.27$ ;  $p<0.01$ ).

550

551 **Figures S7-S13.** Between-study heterogeneity of variance showing that year of  
552 publication ( $X^2=19.10$ ;  $p<0.01$ ), sample size ( $X^2=7.92$ ;  $p<0.01$ ), choice of predictors  
553 ( $X^2=14.92$ ;  $p<0.01$ ), and use of health ( $X^2=7.92$ ;  $p<0.01$ ) and political ( $X^2=22.75$ ;  
554  $p<0.01$ ) covariates strongly impact the degree of heterogeneity.

555

556 **Appendices**

557 **Appendix 1.** Data collected and analysed in this study.

558 **Appendix 2.** R script used to reproduce the present study.

**A**

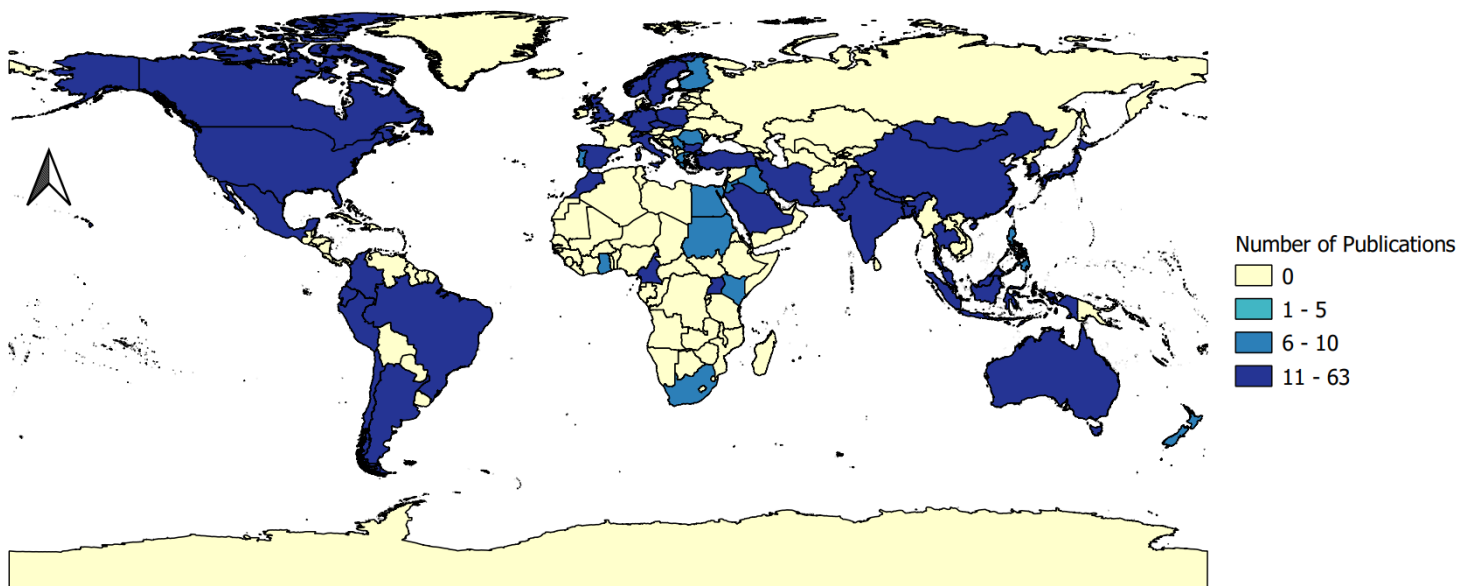

**B**

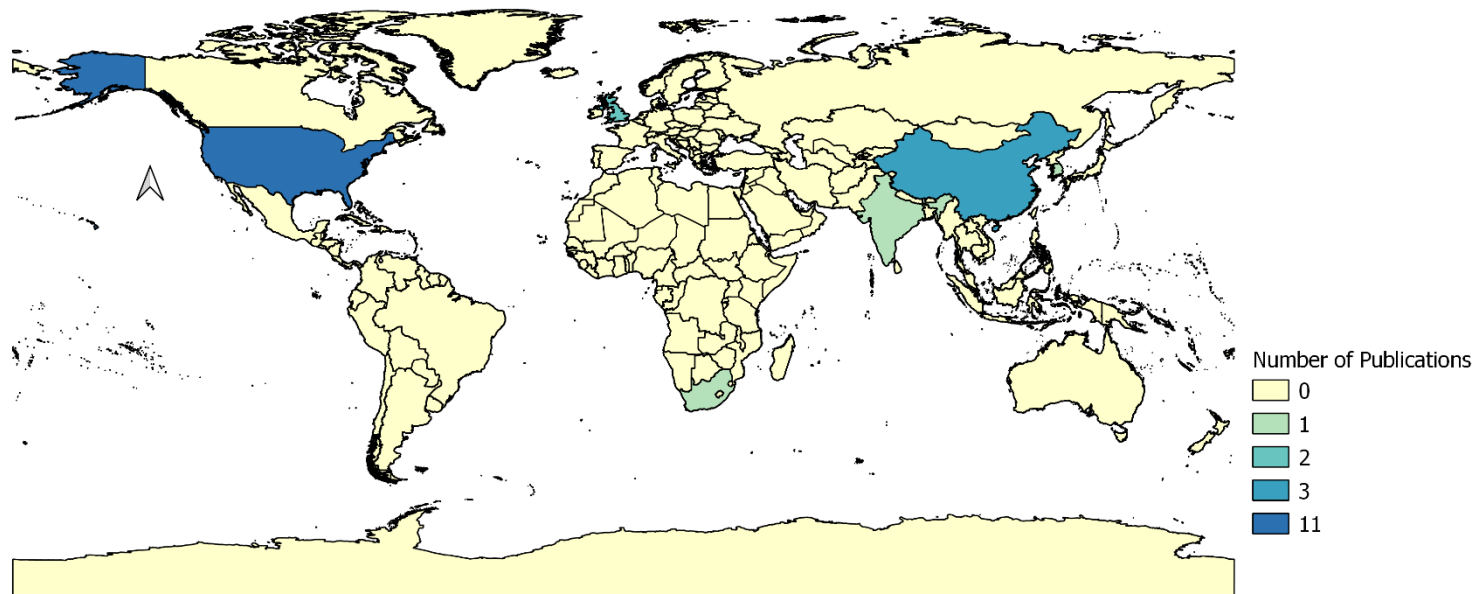

**A**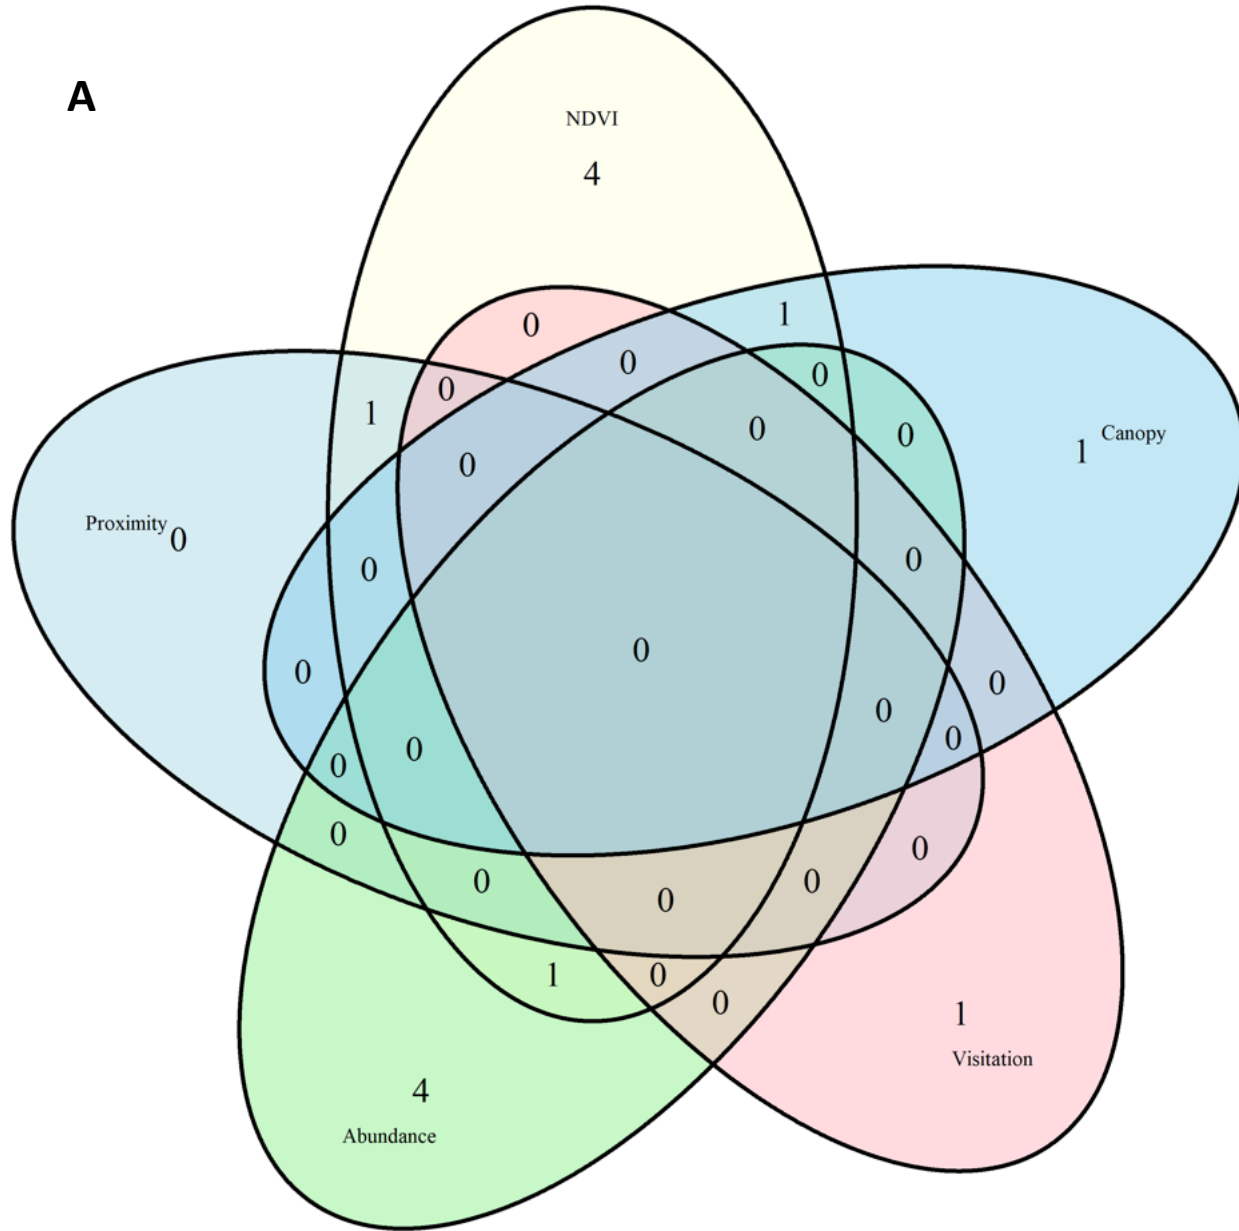**B**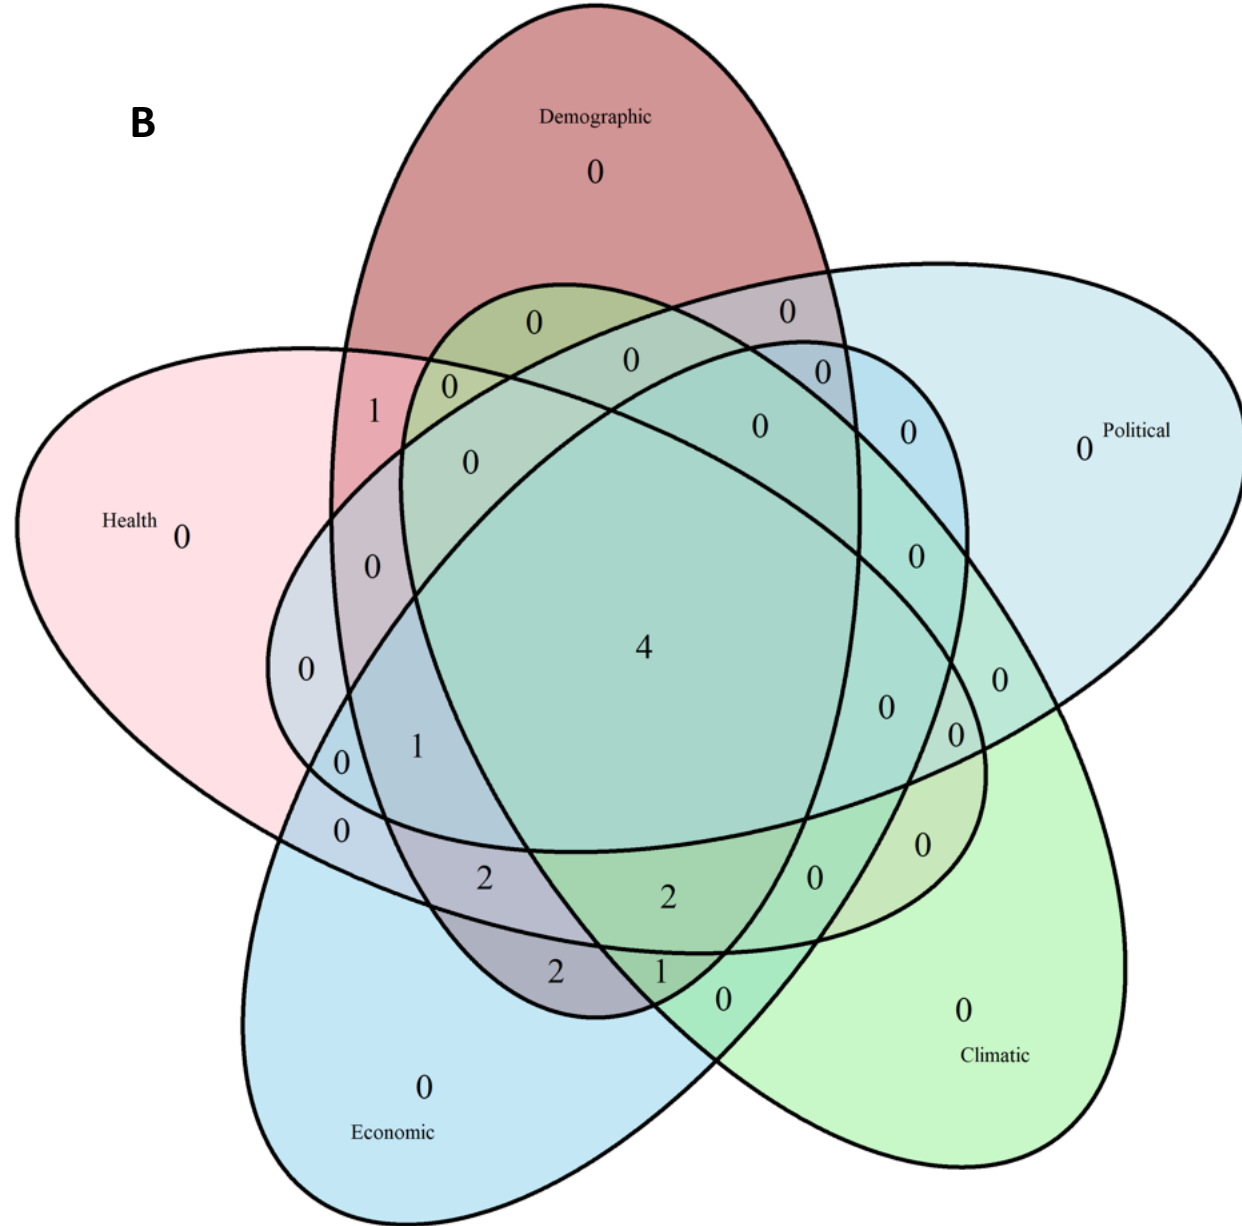

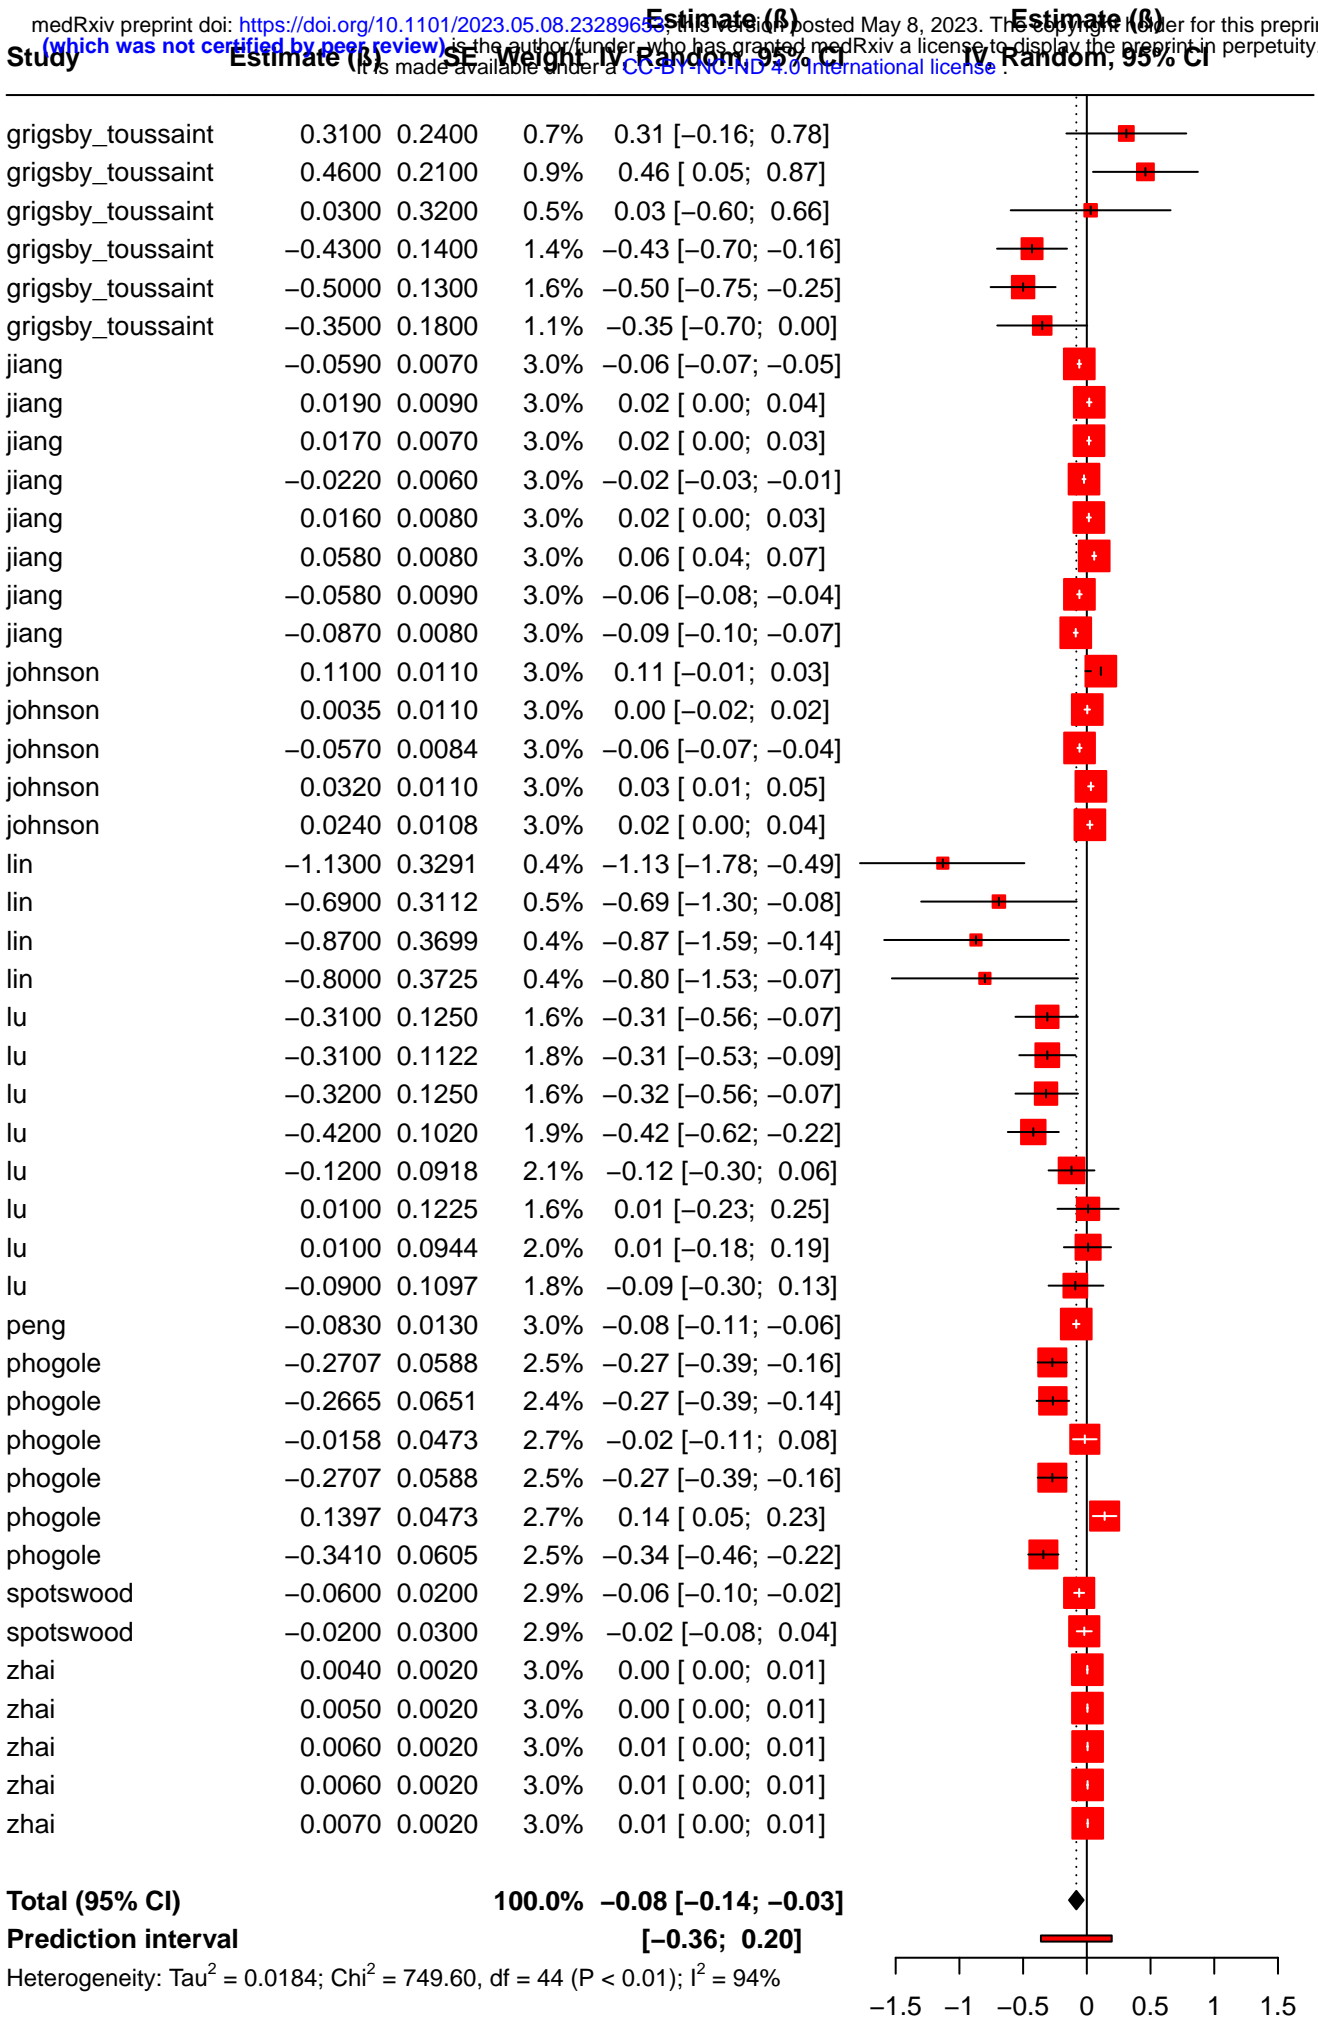

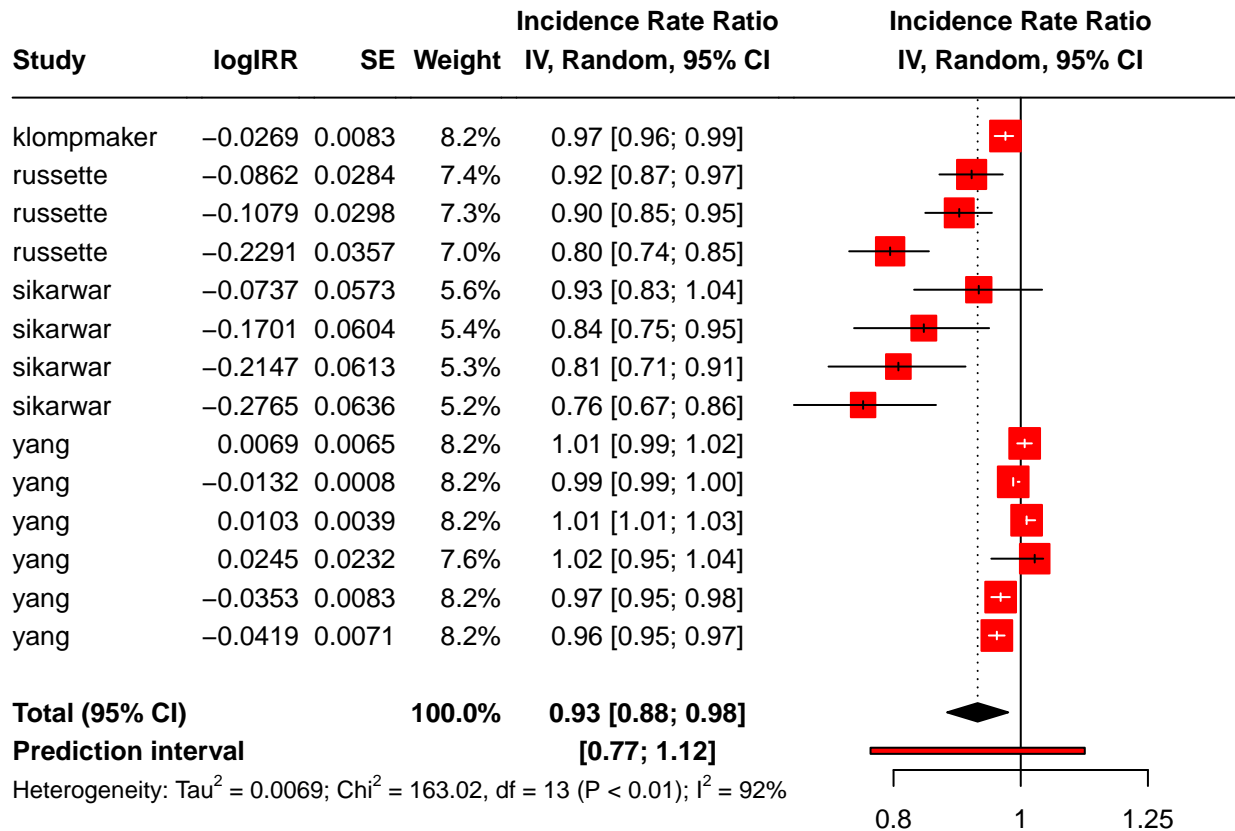



**A**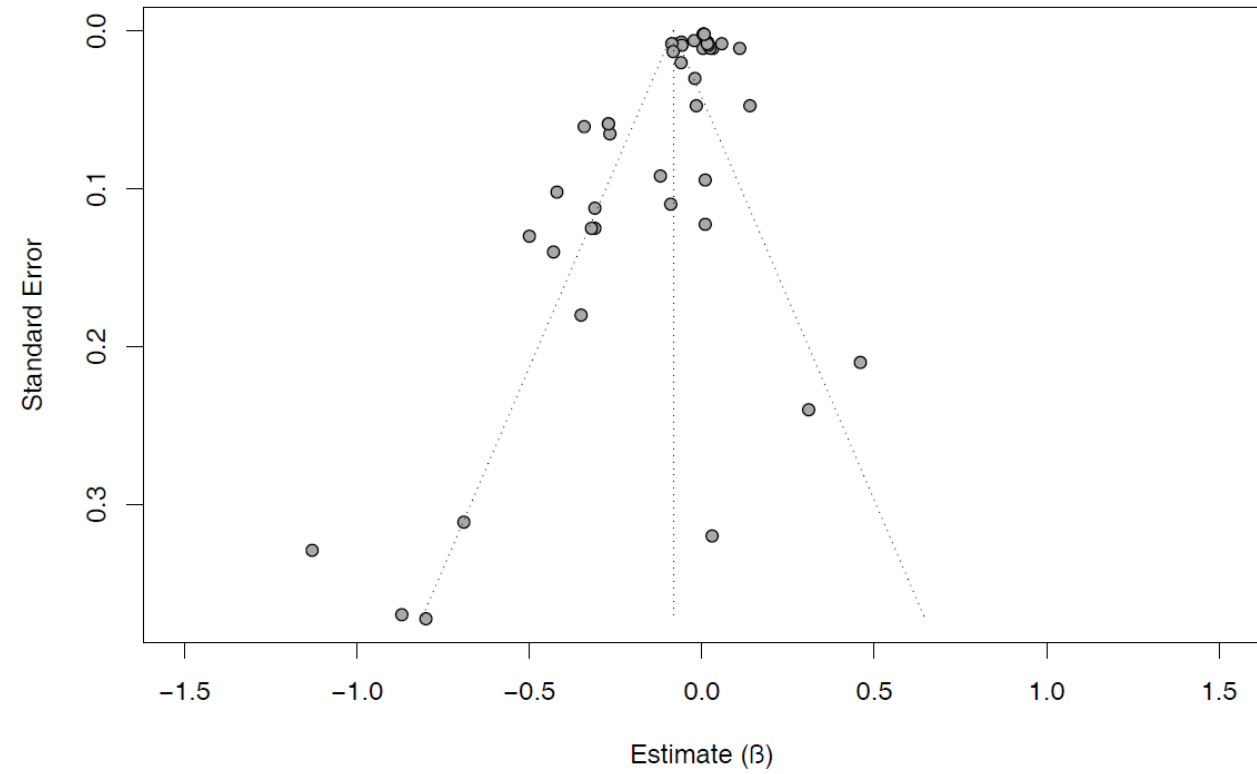**B**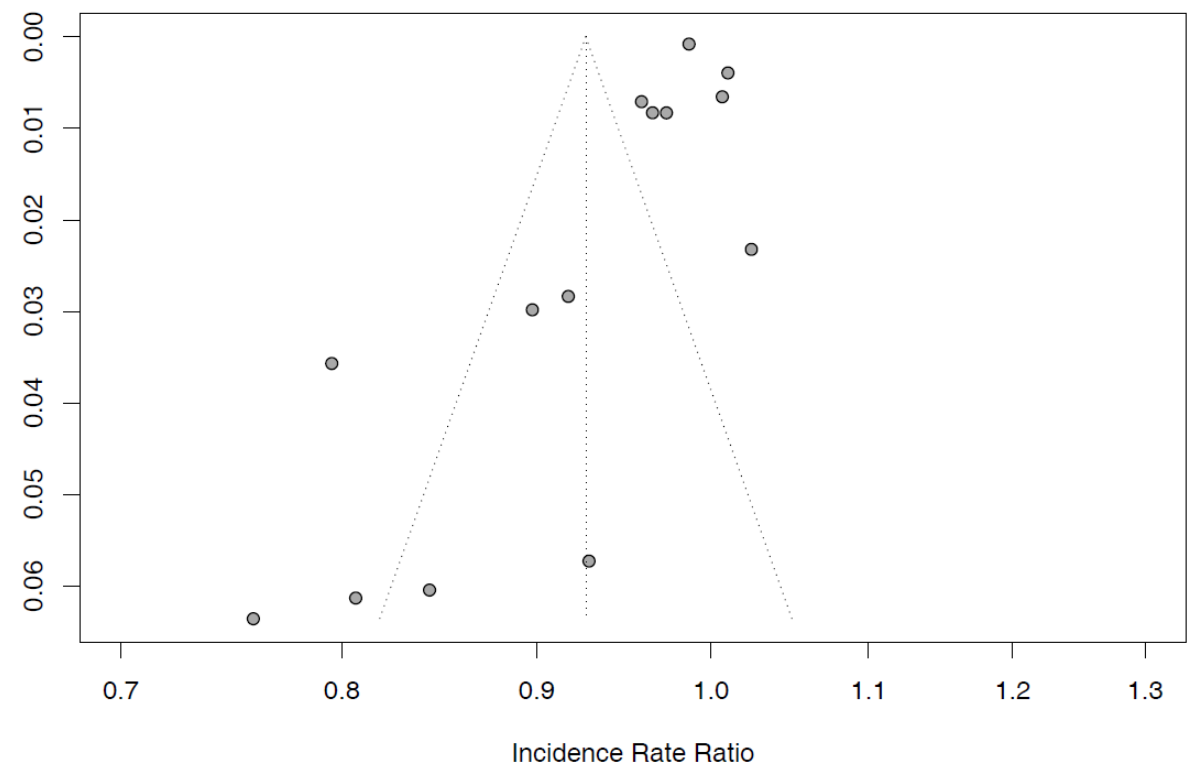

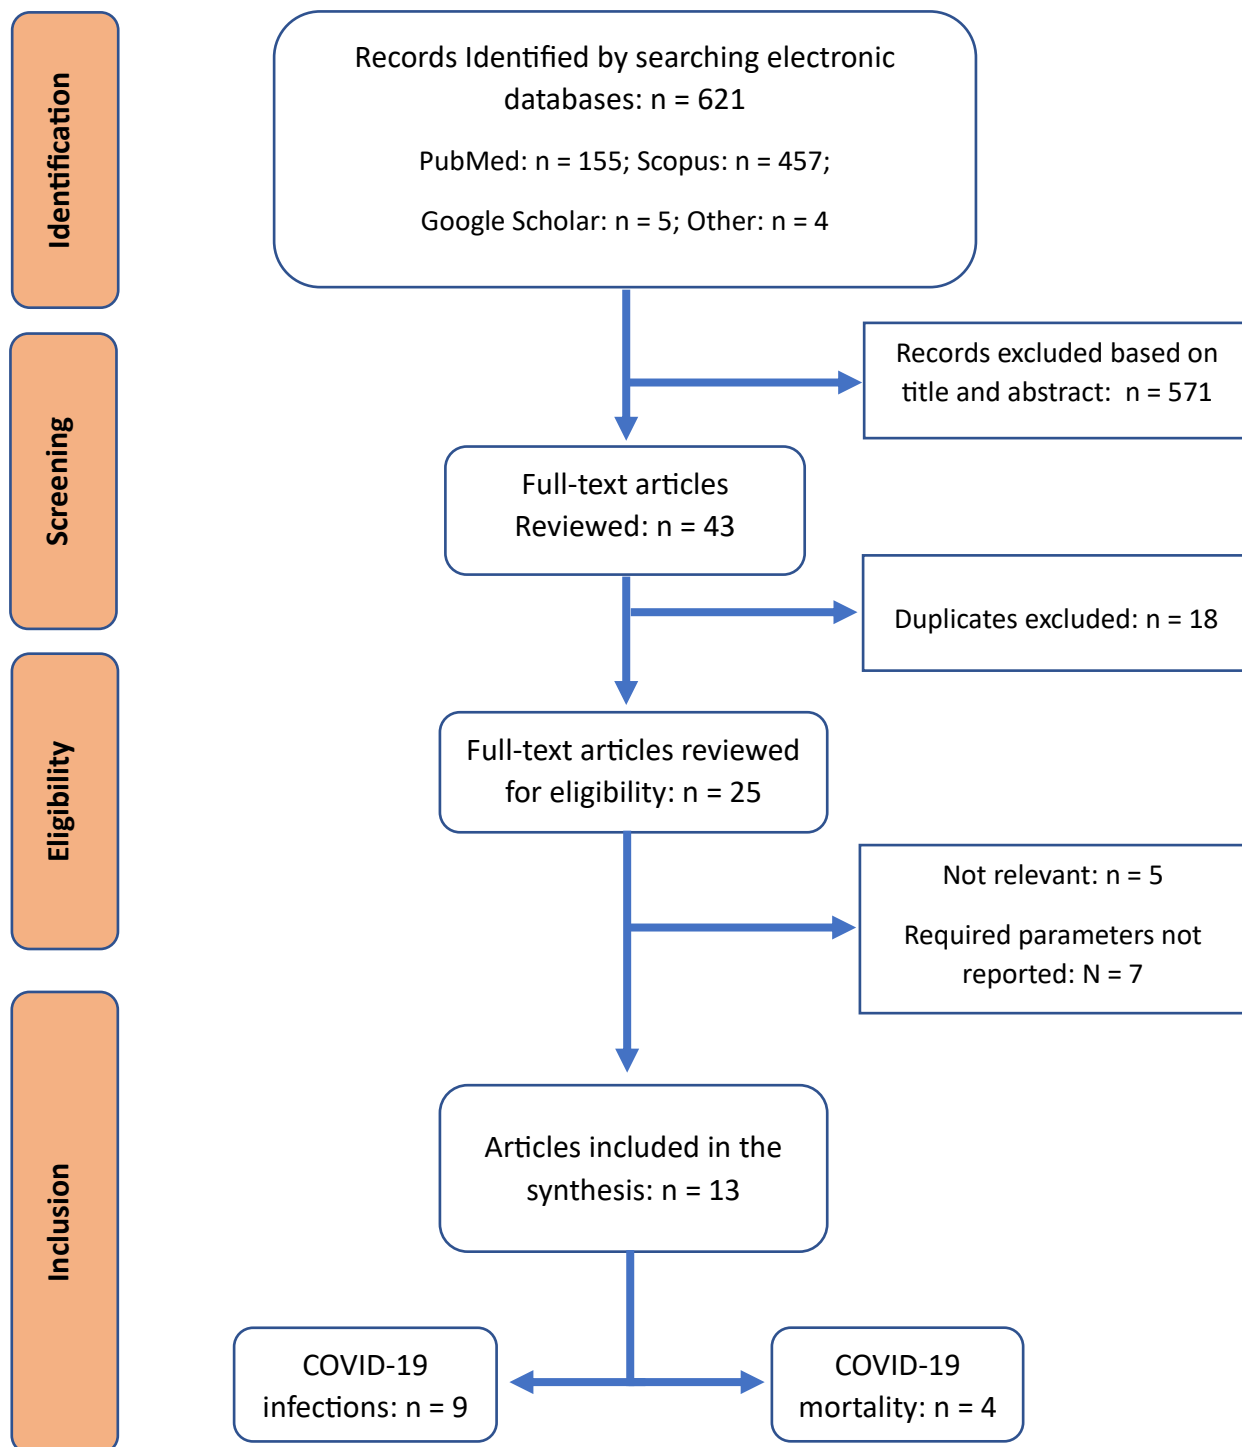

Source: https://medrxiv.org/content/10.1101/2023.05.08.23289653v1.full.pdf
