# Supplementary material for: A global meta-analysis of effects of green infrastructure on COVID-19 infection and mortality rates
Source: bioRxiv or medRxiv preprint supplement (doi:10.1101/2023.05.08.23289653), 2023-05-08

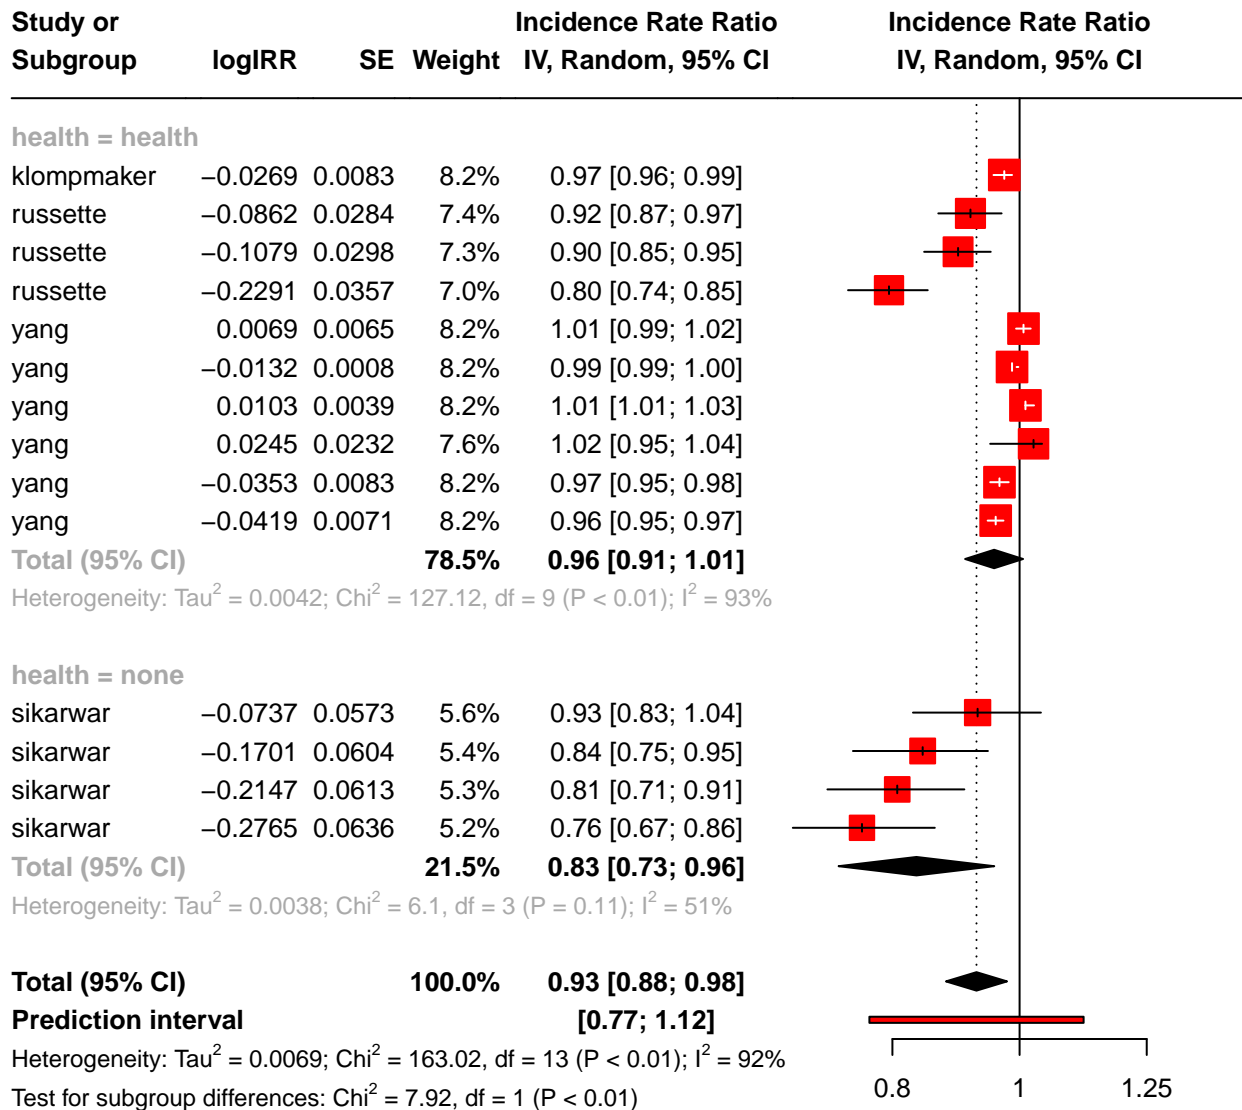

Supplement: Supplementary file [file media-2.zip]
